# Supplementary material
Source: Research Square preprint supplement (doi:10.21203/rs.3.rs-9185933/v1)
Supplement: Supplementary file 1 [file 2de8e79aad89a43ce5612e26.docx]

**Graph 2: Diagnosis within the sample**


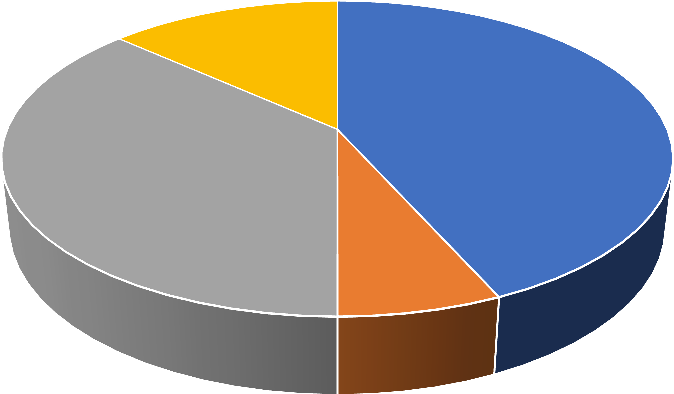


N

SDNS

13%

First episode

Infrequent 43%

relapser

37% Frequent relapser

7%

First episode Frequent relapser Infrequent relapser SDNS
